# Supplementary material
Source: publisher site journal article supplement (https://www.spandidos-publications.com/3568/downloadSupplementary)

Figure S1. Expression of acid-sensing ion channel 1a is associated with improved survival in glioblastoma patients. Kaplan-Meier survival curve for the 5-year overall survival rate of glioma patients of (A) classical subtype ( $P=0.0186$ ; log-rank test), (B) neural subtype ( $P=0.0343$ ; log-rank test), (C) proneural subtype ( $P=0.0535$ , log-rank test), (D) with chemotherapy treatment ( $P=0.0186$ , log-rank test), (E) without chemotherapy ( $P=0.0254$ , log-rank test), and (F) without hormonal treatment ( $P=0.0067$ , log-rank test). TCGA, The Cancer Genome Atlas.

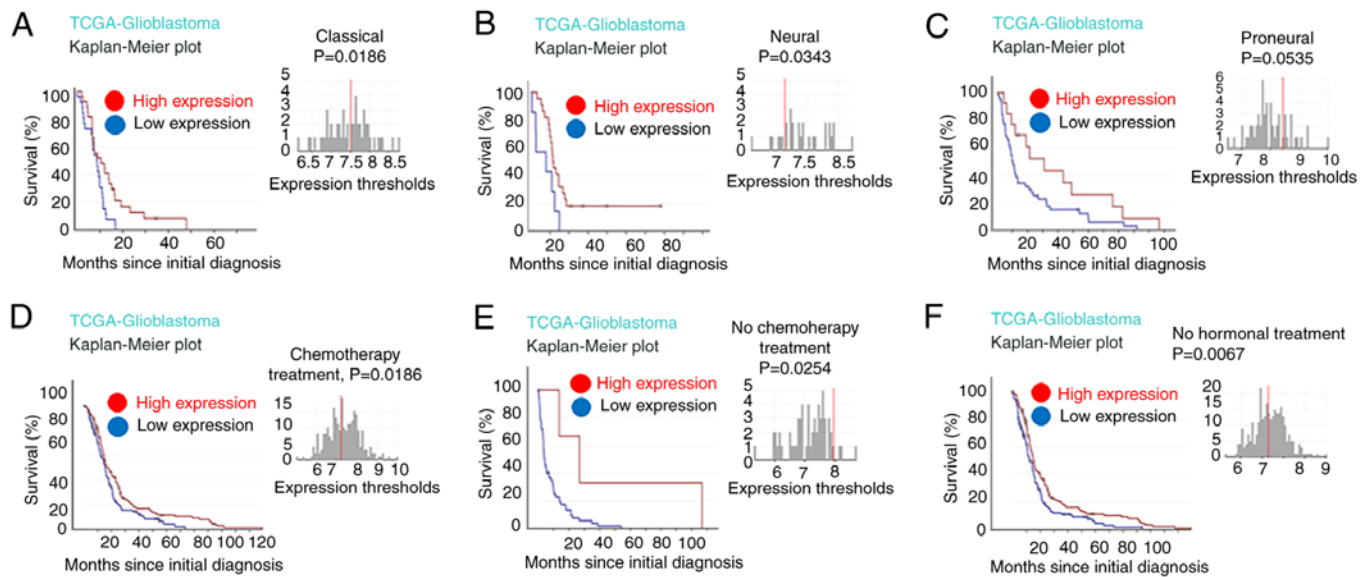

Figure S2. Glioblastoma stem cell marker CD133 expression is increased when acid-sensing ion channel 1a is inhibited by PcTx1 in glioma PDX-L12 cells. Flow cytometric analysis to assess CD133 expression in PDX-L12 glioma cells treated by 10 nM of PcTx1 for 72 h. \*P<0.05. PcTx1, plasmotoxin.

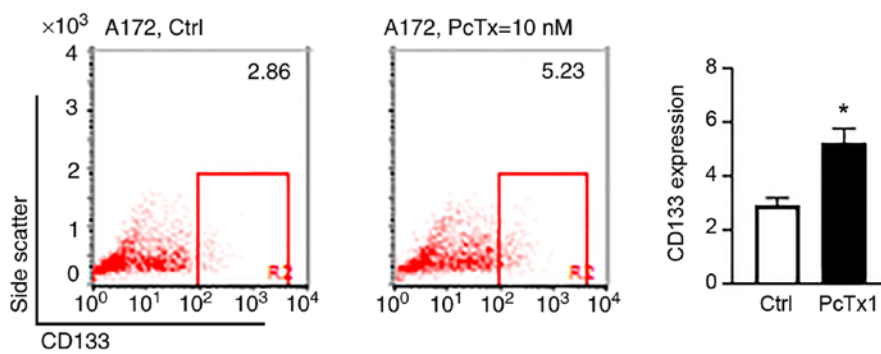

Supplement: Supplementary file 1 [file downloadSupplementary]
